# Supplementary material
Source: PubMed Central journal article supplement (PMC6328432)

# Supplementary Figure 1

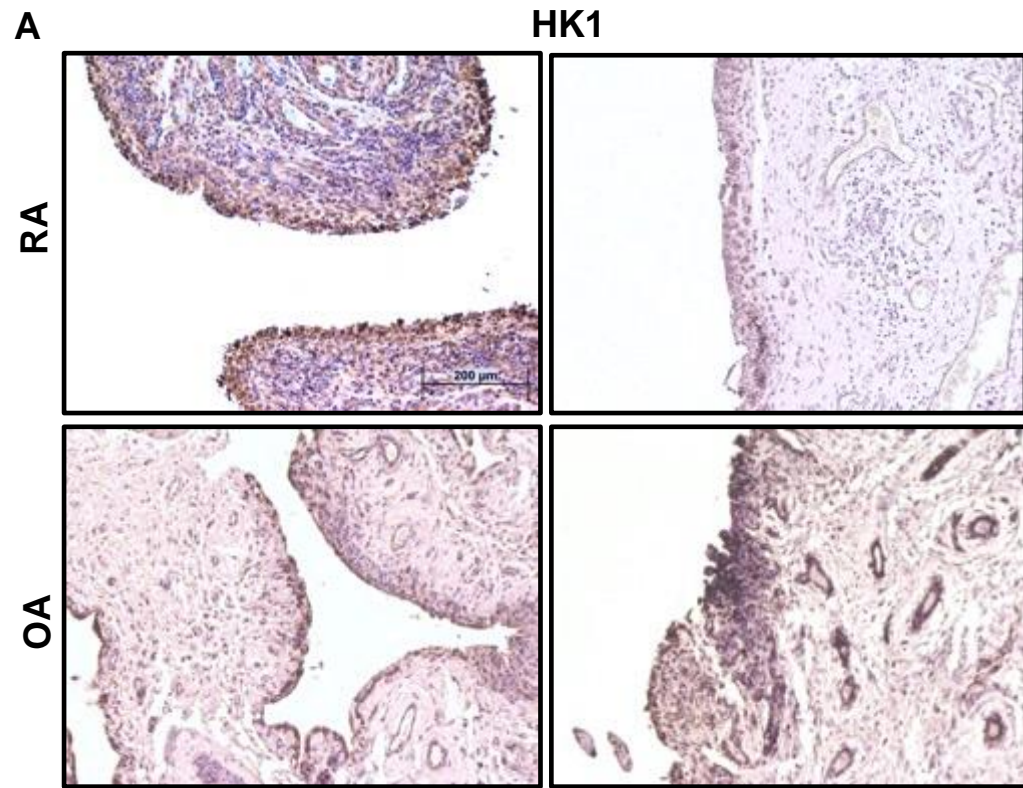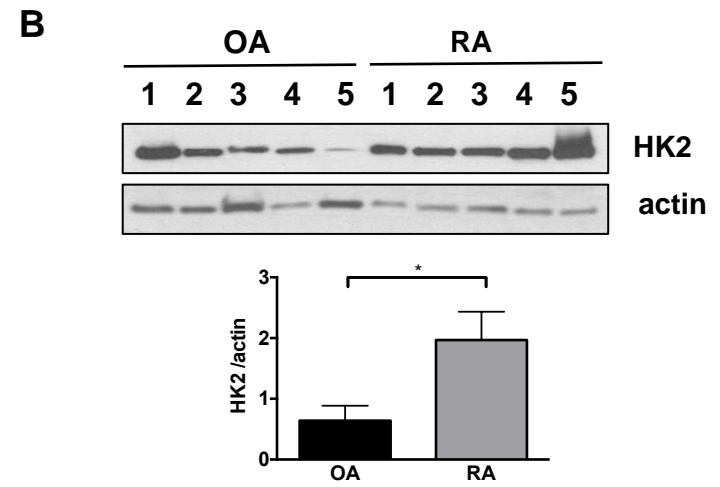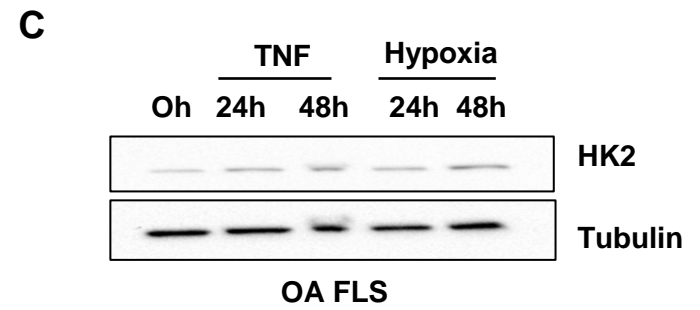

# Supplementary Figure 2

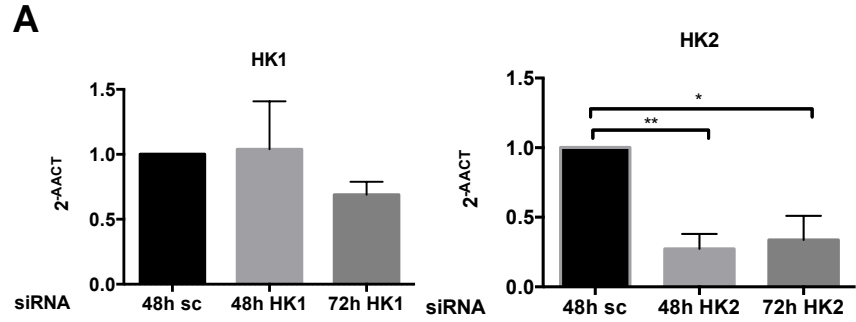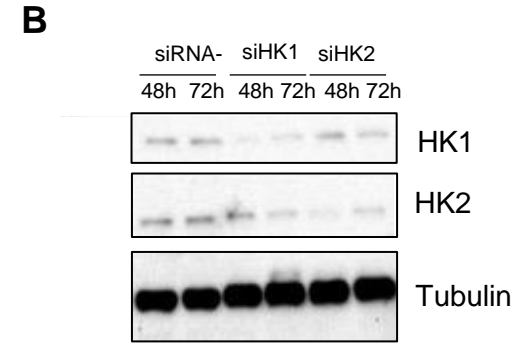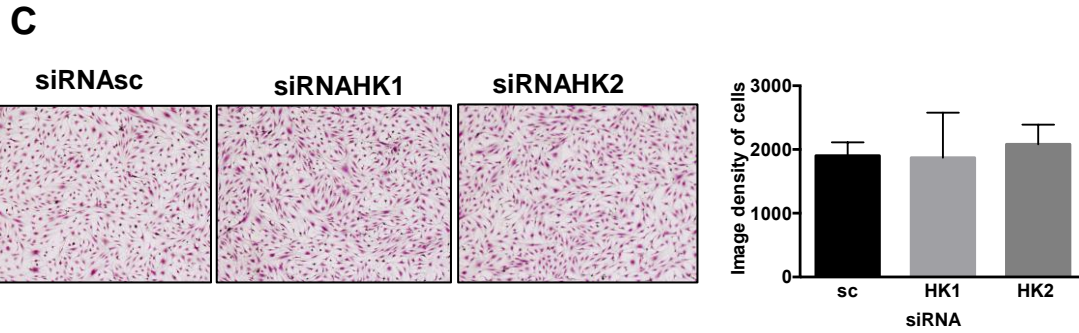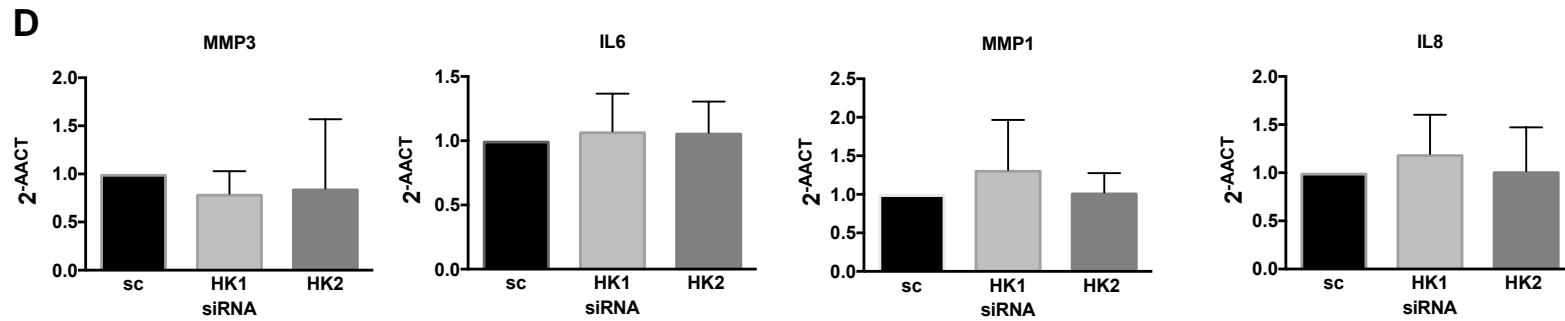

# Supplementary Figure 3

**A**

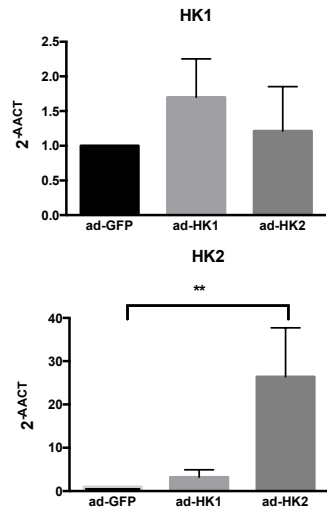

**C**

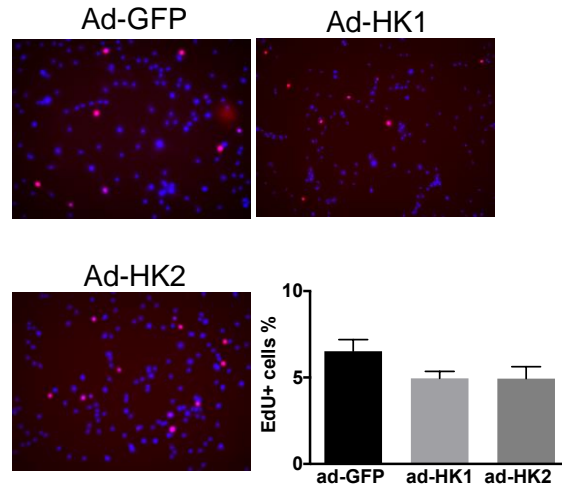

**B**

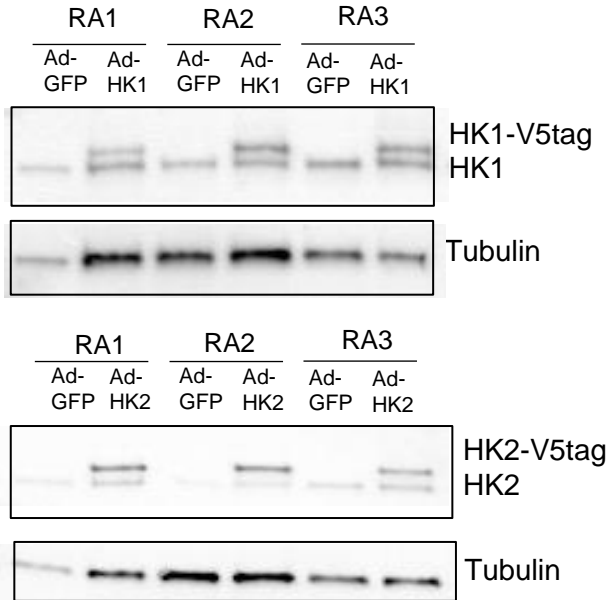

# Supplementary Figure 4

Baseline

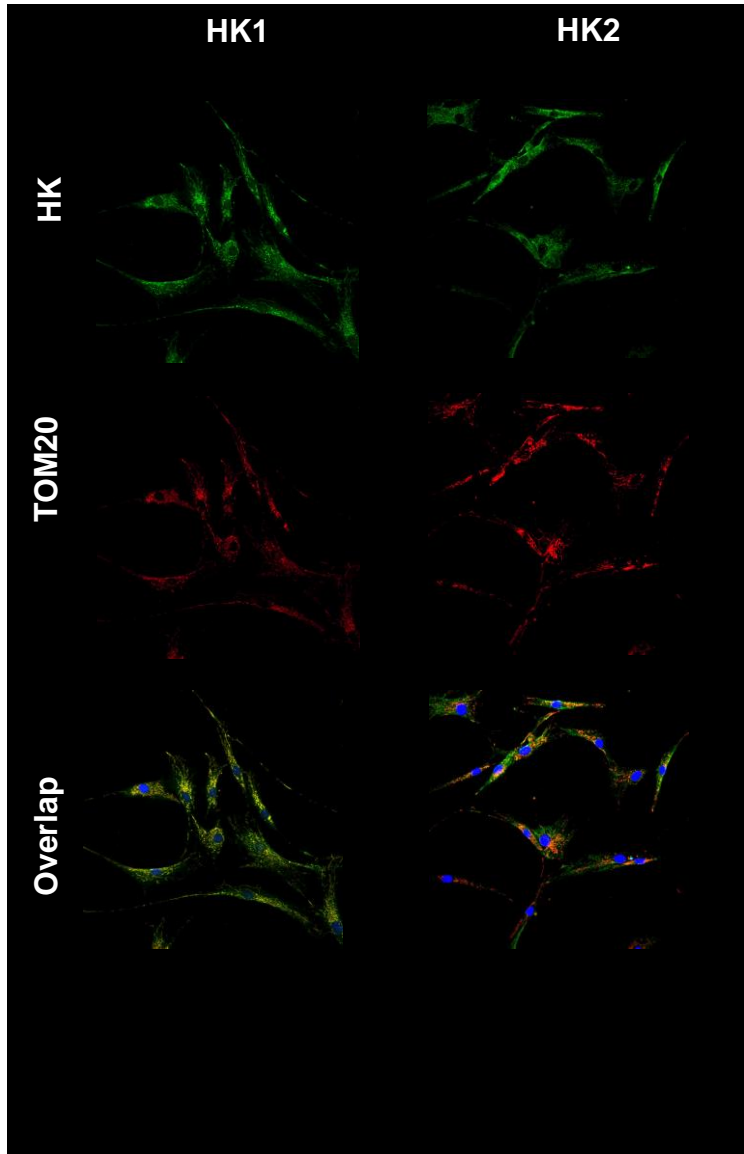

Adenovirus

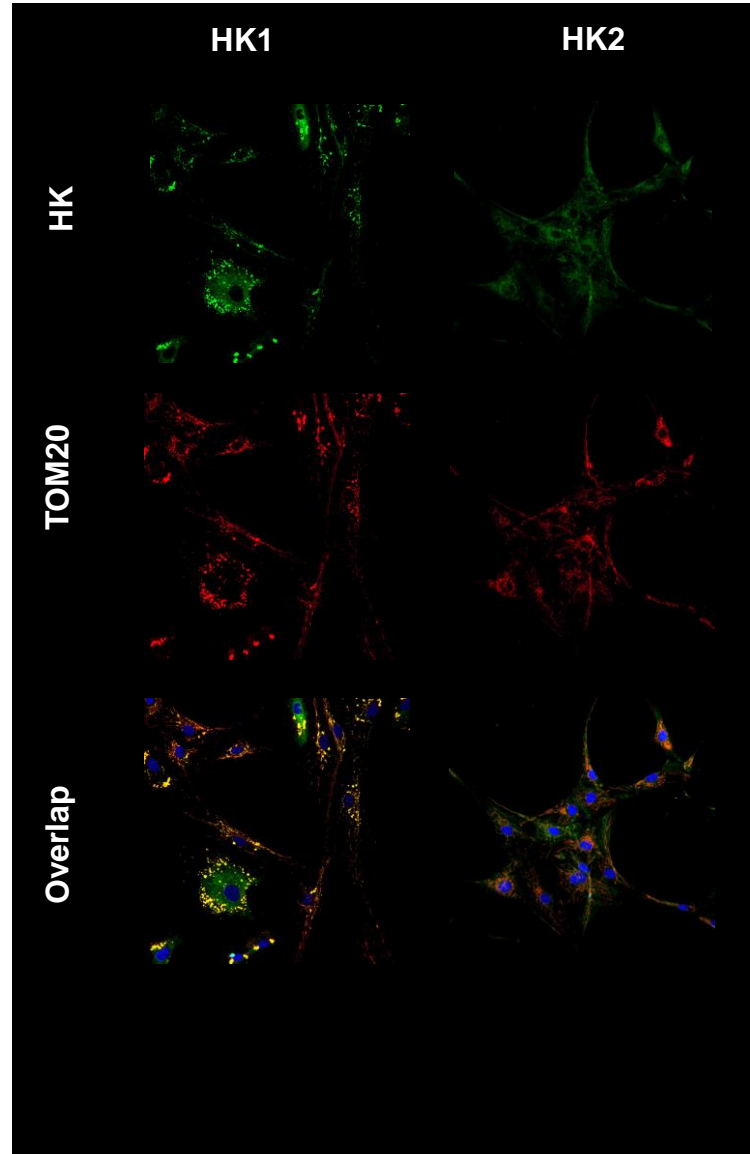

Supplement: NIHMS996408-supplement-1.pdf [file NIHMS996408-supplement-1.pdf]
